# Supplementary material
Source: ML conference proceedings conference paper supplement (https://www.ecva.net/papers/eccv_2022/papers_ECCV/html/136970587_ECCV_2022_paper.php)
Supplement: Supplementary file 1 [file 136970587-supp.pdf]

# Supplementary for Towards Regression-Free Neural Networks for Diverse Compute Platforms

Rahul Duggal\*   Hao Zhou   Shuo Yang  
Jun Fang   Yuanjun Xiong   Wei Xia

AWS/Amazon AI  
rduggal7@gatech.edu   {zhouho, shuoy, junfa, yuanjx, wxia}@amazon.com

## A Implicit reduction of negative flips through weight sharing

We hypothesize that weight sharing leads to lower negative flips. Fig. 1 presents empirical results to support this hypothesis.

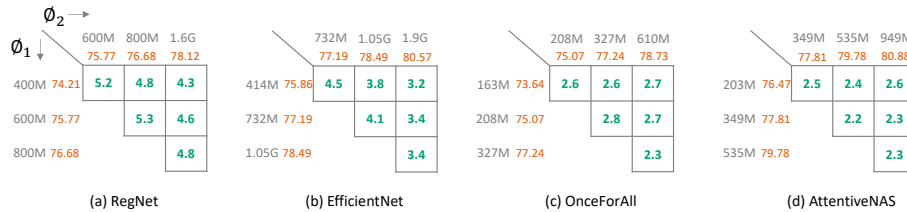

**Fig. 1:** We present the Top-1 accuracy (in orange), pair-wise negative flip rate (in green) and flops (in black) for a family of neural networks obtained via four model design algorithms. The algorithms in (a) and (b) re-train each model independently and lead to much higher NFR compared to One-Shot NAS algorithms in (c) and (d) that jointly train all sub-networks in a super-network.

Fig. 1 plots the negative flip rate and Top-1 accuracies from four popular model families—RegNet [2], EfficientNet [3], Onceforall [1] and AttentiveNAS [4]. Among these the first two i.e. RegNet and EfficientNet independently train the models of different sizes while the latter two i.e. Onceforall and AttentiveNAS sample networks from a common super-network and benefit from weight sharing. From the figure, we can clearly see that for similar gaps in accuracies, the latter two methods which benefit from weight-sharing (i.e. Fig. 1c,d) lead to much lower negative flip rate than the former two (i.e. Fig. 1a,b).

\* Currently at Georgia Tech. Work conducted during an internship with AWS AI.

## B Exploring the Top-1 accuracy *v.s.* NFR tradeoff

| $\frac{\lambda_2}{\lambda_1}$ | Mflops | Top-1 Accuracy<br>$\uparrow(\%)$ | NFR<br>$\downarrow(\%)$ |
|-------------------------------|--------|----------------------------------|-------------------------|
| 0.05                          | 297    | 76.91                            | 2.67                    |
| 0.1                           | 295    | 77.09                            | 2.70                    |
| 0.2                           | 298    | 77.03                            | 2.63                    |
| 0.5                           | 299    | 76.94                            | 2.27                    |
| 1                             | 295    | 76.86                            | 2.27                    |
| 2                             | 294    | 76.94                            | 2.24                    |
| 5                             | 290    | 76.74                            | 2.15                    |
| 10                            | 295    | 76.78                            | 2.19                    |
| 20                            | 270    | 76.15                            | 2.08                    |

**Table 1:** We measure the impact of varying the weighting factors  $\lambda_1$  and  $\lambda_2$  on the Top-1 accuracy and NFR of the searched models. Given a fixed 150 Mflop reference model from the MobileNet-V3 search space of OFA, we search a 300 Mflops target model while varying  $\lambda_1$  and  $\lambda_2$ . Observe that large values of  $\lambda_1$  prioritize Top-1 accuracy leading to high Top-1, at the cost of high NFR. Large values of  $\lambda_2$  prioritizes NFR leading to low NFRs at the loss of low accuracy. Overall, setting  $\lambda_1 = \lambda_2 = 1$  leads to reasonable trade-off for both the Top-1 accuracy and NFR.

The search reward of Eq. 4 equally weighs the NFR and Top-1 accuracy by setting  $\lambda_1 = \lambda_2 = 1$ . In Table 1, we explore the NFR *v.s.* Top-1 trade-off by setting different values of the  $\lambda$  multipliers *i.e.*  $\frac{\lambda_2}{\lambda_1} \in [0.05, 20]$ . The results follow the expected trend wherein for  $\frac{\lambda_2}{\lambda_1} \in [0.05, 1)$  the Top-1 accuracy is prioritized over NFR which becomes as high as 2.70. At the other end, for  $\frac{\lambda_2}{\lambda_1} \in (1, 20]$  the NFR is prioritized over Top-1 accuracy so that NFR becomes as low as 2.08. Overall, equally weighing the two metrics, *i.e.*  $\frac{\lambda_2}{\lambda_1} = 1$  leads to a reasonably high Top-1 accuracy with a reasonably low *NFR*. Thus we use  $\lambda_1 = \lambda_2 = 1$  for REG-NAS.

## C How significant are the results of REG-NAS?

We strive to find models that achieve a high Top-1 accuracy and low negative flip rate (NFR). To demonstrate the significance of our results, we extend Table 1 of the main paper by calculating the *relative change* of Top-1 accuracy and NFR which is defined as below:

$$\mathcal{C}(\phi_1, \phi_2) = \frac{\mathcal{M}(\phi_1) - \mathcal{M}(\phi_2)}{\mathcal{M}(\phi_2)}, \quad (1)$$

where  $\mathcal{M} \in \{\text{Top-1, NFR}\}$  and  $\phi_1, \phi_2$  are two models.

| Model     |                                | Top-1 $\uparrow$ (%) |               | NFR $\downarrow$ (%) |               |
|-----------|--------------------------------|----------------------|---------------|----------------------|---------------|
|           |                                | Abs.                 | $\mathcal{C}$ | Abs.                 | $\mathcal{C}$ |
| ref       | MB- $\mathcal{R}_0$ -150 [1]   | 73.70                | -             | -                    | -             |
| baseline  | EffNet                         | 77.08                | -0.30         | 4.25                 | -49.1         |
| PCT       | EffNet+FD [5]                  | 76.25                | +0.76         | 3.25                 | -33.5         |
| wt. share | MB- $\mathcal{R}_0$ -300 [1]   | 77.11                | -0.37         | 2.51                 | -13.9         |
| proposed  | MB-( $\mathcal{R}_2$ +CAS)-300 | 76.83                | 0             | 2.16                 | 0             |

(a) MobileNet-V3 search space of OFA

| Model     |                                 | Top-1 $\uparrow$ (%) |               | NFR $\downarrow$ (%) |               |
|-----------|---------------------------------|----------------------|---------------|----------------------|---------------|
|           |                                 | Abs.                 | $\mathcal{C}$ | Abs.                 | $\mathcal{C}$ |
| ref       | RN- $\mathcal{R}_0$ -2000 [1]   | 78.25                | -             | -                    | -             |
| baseline  | RN101                           | 79.21                | -0.51         | 4.83                 | -67.4         |
| PCT       | RN101+FD [5]                    | 79.90                | -1.37         | 3.06                 | -48.6         |
| wt. share | RN- $\mathcal{R}_0$ -3000 [1]   | 78.78                | -0.02         | 2.04                 | -23.0         |
| proposed  | RN-( $\mathcal{R}_2$ +CAS)-3000 | 78.80                | 0             | 1.57                 | 0             |

(b) ResNet search space of OFA

**Table 2:** Extending Table 1 from the main paper. In addition to the absolute values (abs.), we present the relative change ( $\mathcal{C}$ ) of Top-1 accuracy and NFR. EffNet and RN101 represents EfficientNet-B0 and ResNet-101 trained with cross entropy loss while EffNet+FD and RN101+FD are trained with state-of-the-art focal distillation loss [5]. Results of weight sharing and our proposed method are averaged from three runs with different random seeds. Observe that REG-NAS leads to a large relative change in NFR at a marginal expense of the Top-1 accuracy.

Table 2 presents the relative change of Top-1 accuracy and NFR between the model searched via REG-NAS (considered as  $\phi_1$ ) and other models (considered as  $\phi_2$ ). The results show that REG-NAS leads to large relative reduction of NFR *e.g.* upto 50% and 33.5% w.r.t. baseline and state-of-the-art on MobileNet-V3 super-network and upto 67.4% and 48.6% w.r.t. baseline and state-of-the-art on the ResNet-50 super-network of OFA[1]. This reduction in NFR is despite very little (*e.g.* less than 1%) relative change of Top-1 accuracy. These results clearly demonstrate that REG-NAS can significantly reduce NFR at minimal expense of Top-1 accuracy.

## D Extending the search to 4 architectures

| Method  | Results                                                                                                           |
|---------|-------------------------------------------------------------------------------------------------------------------|
| OFA [1] | $A_1(78.2\%) \xleftarrow{2.04\%} A_2(78.8\%) \xleftarrow{1.53\%} A_3(79.2\%) \xleftarrow{1.34\%} A_4(79.4\%)$<br> |
| REG-NAS | $A_1(78.2\%) \xleftarrow{1.57\%} A_2(78.8\%) \xleftarrow{0.83\%} A_3(79.0\%) \xleftarrow{0.91\%} A_4(79.4\%)$<br> |

**Table 3:** Testing generalization of REG-NAS for searching 4 models with diverse compute budgets from the ResNet search space of OFA [1]. Model size increases from  $A_1$  to  $A_4$ . NFR is indicated in green and Top-1 accuracy in orange. REG-NAS successfully reduces NFR in all scenarios.

Table 4 of the main paper presents the NFR and Top-1 accuracy for three models *i.e.* A1 (2000 Mflops), A2 (3000 Mflops), A3 (4000 Mflops) from the ResNet search space of OFA [1]. However, one could also extend the search to a larger family of models. Table 3 extends the search to a larger model A4 (5000 Mflops) from the ResNet search space of OFA [1]. Observe that the four models A1-A4 searched via REG-NAS achieve significantly smaller pairwise NFR in all cases, with minimal loss of Top-1 accuracy. This demonstrates that REG-NAS generalizes to searching for regression-free models across multiple flops budgets. Note that for this experiment, we only consider the ResNet space of OFA since the MobileNet-V3 space cannot search sub-networks larger than A3 (600 Mflops).

## References

1. Cai, H., Gan, C., Wang, T., Zhang, Z., Han, S.: Once for all: Train one network and specialize it for efficient deployment. In: ICLR (2020)
2. Radosavovic, I., Kosaraju, R.P., Girshick, R., He, K., Dollár, P.: Designing network design spaces. In: CVPR (2020)
3. Tan, M., Le, Q.: EfficientNet: Rethinking model scaling for convolutional neural networks. In: ICML (2019)
4. Wang, D., Li, M., Gong, C., Chandra, V.: Attentiveness: Improving neural architecture search via attentive sampling. In: CVPR (2021)
5. Yan, S., Xiong, Y., Kundu, K., Yang, S., Deng, S., Wang, M., Xia, W., Soatto, S.: Positive-congruent training: Towards regression-free model updates. In: CVPR (2021)
